# Supplementary material
Source: bioRxiv or medRxiv preprint supplement (https://www.biorxiv.org/highwire/filestream/11948/field_highwire_adjunct_files/0/043935-1.pdf)
Supplement: Supplementary file [file 043935-1.pdf]

SUPPLEMENTAL FIGURES AND TABLES

Scott, Trahan et al., Figure S1

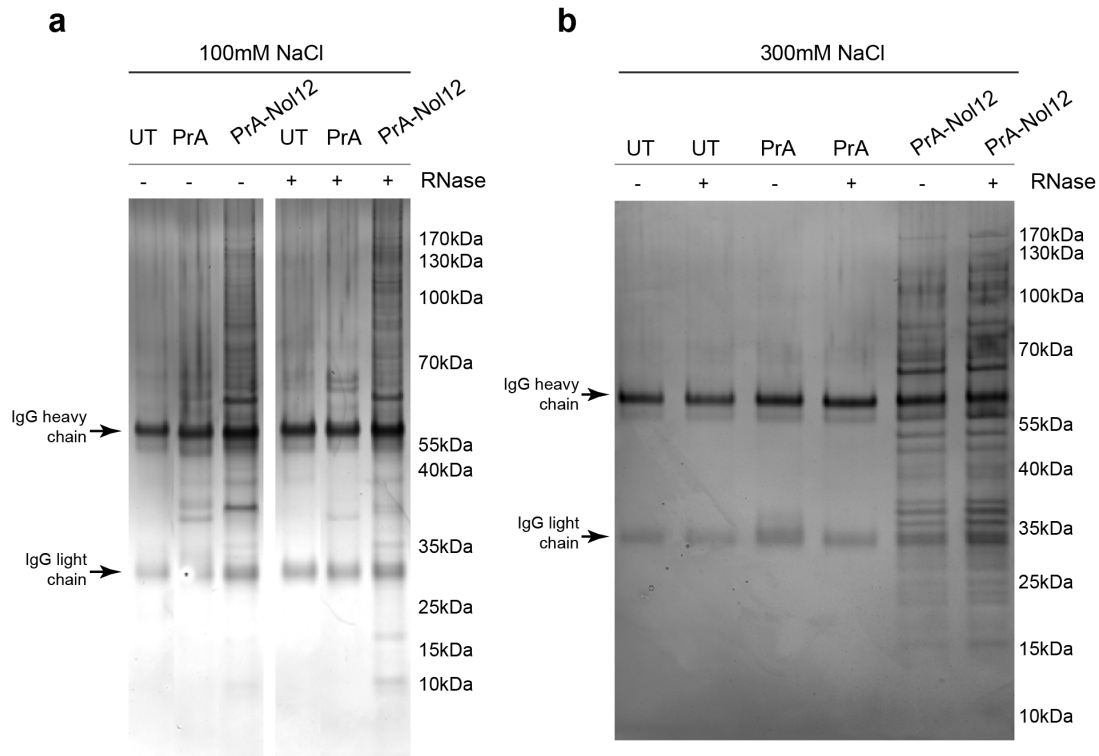

c

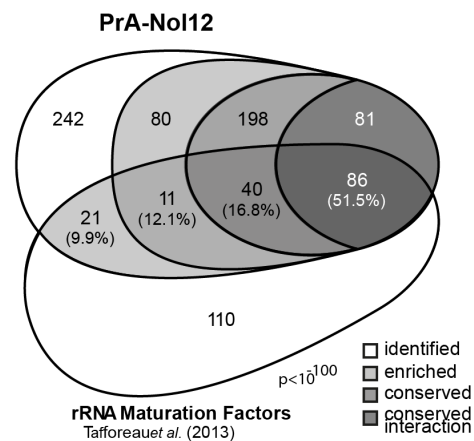

**Figure S1. Nol12 interactome overlaps partially with pre-ribosome complexes.** (a) Analysis of ssAP samples by gel electrophoresis, comparing UT (untagged) PrA-, or PrA-Nol12 expressing HEK293 cells in different salt condition +/- RNase. (b) Overlap of PrA-Nol12 purification classes from (Figure 1 a) were compared to the ribosome-regulatory list of Tafforeau *et al.* (Tafforeau et al., 2013) and statistical significance calculated by hypergeometric testing.

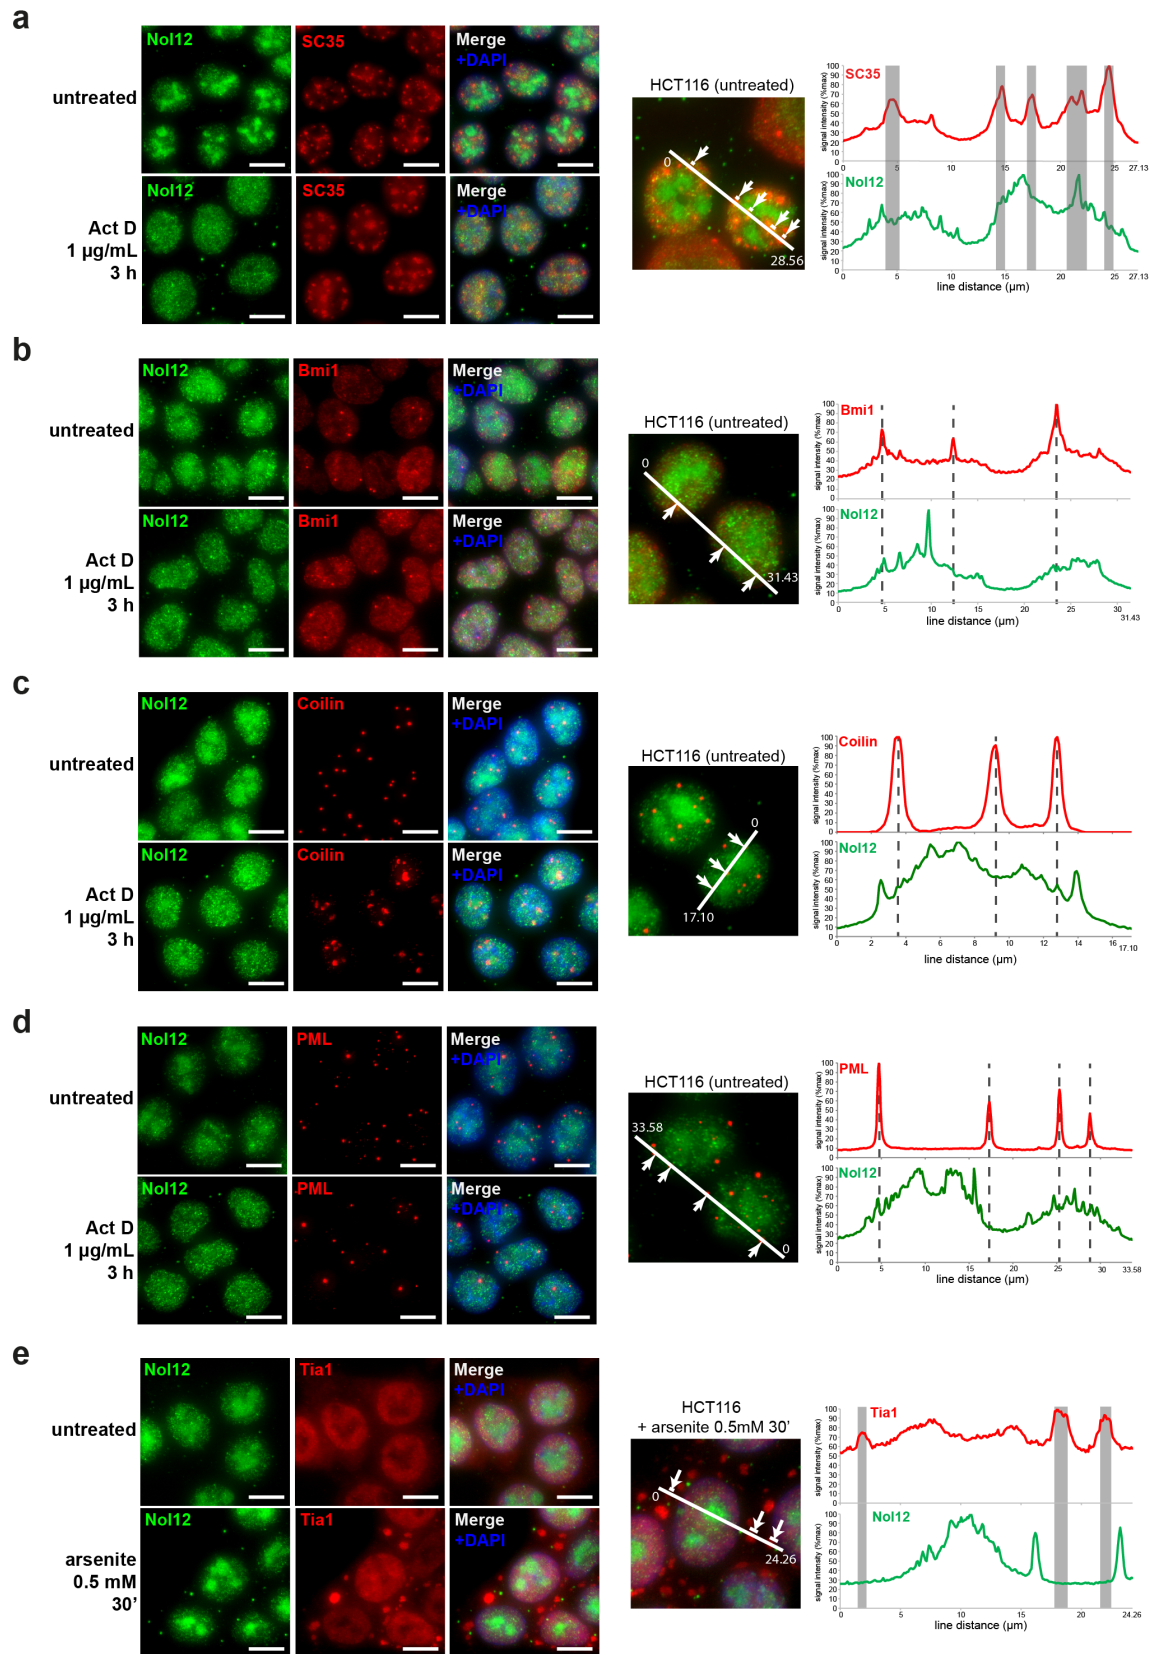

**Figure S2. Co-localization of Nol12 with subcellular structures.** HCT116 WT cells were grown on poly-L-lysine-coated coverslips for 48h, with or without treatment with either (a-d) actinomycin D (1ug/ml, 3h), or (e) sodium arsenite (0.5 mM, 30') prior to fixation and immunofluorescence analysis. Nol12 localization was compared to that of markers for various cellular granules including splicing speckles (a), polycomb bodies (b), Cajal bodies (c), PML bodies (d), and stress granules (e). Linear profiles of fluorescence density were created from representative images of each co-immunofluorescence experiment and normalized against the maximum observed fluorescence along the line segment. Dotted lines indicate the location of local fluorescence maxima in the marker channel, and colocalization was analysed using the Fiji software Coloc2 module.

**a**

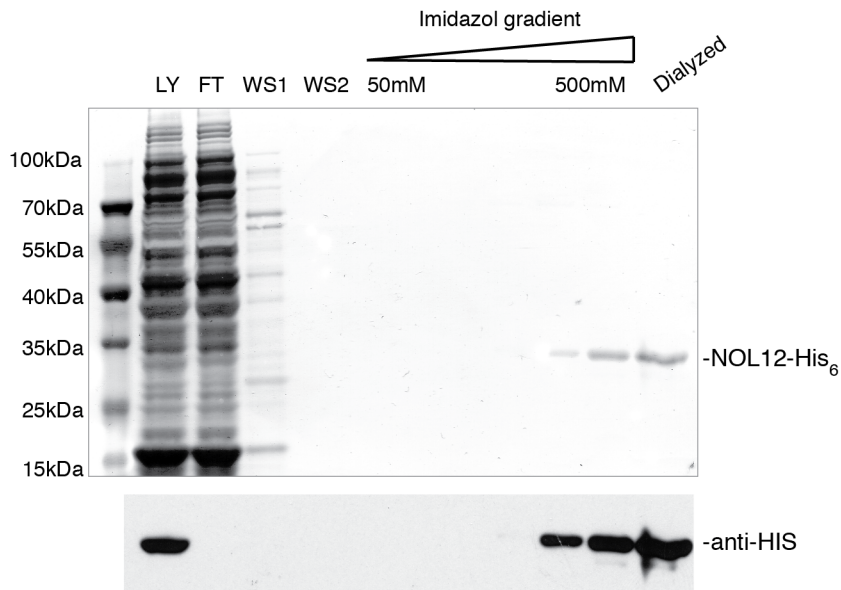

**b**

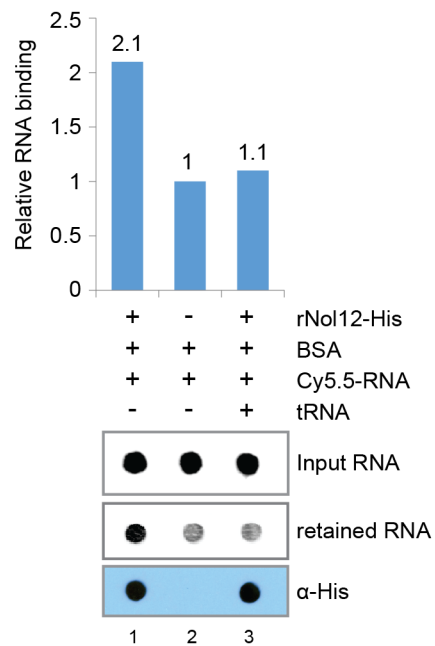

**Supplementary Figure 3. Nol12 is a non-specific RNA binding protein.** (a) PAGE Analysis of rNOL12. (b)Nol12 binds to ssRNA *in vitro*. RNA binding was determined by resolving the complexes by retention on a nylon membrane. RNA signals were resolved on a Li-Cor Odyssey Infrared scanner. Retained RNAs were normalized on the signal observed for the BSA only control.

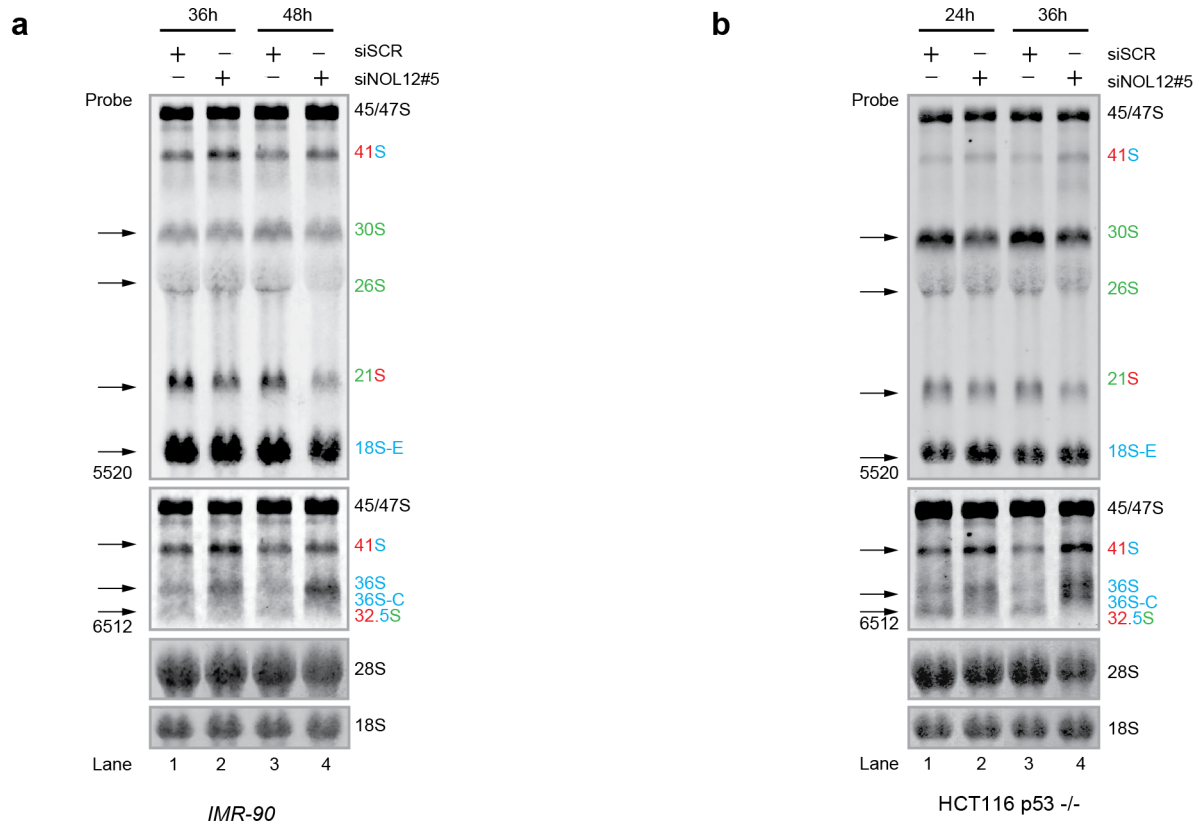

**Supplementary Figure 4. Knockdown of Nol12 causes rRNA processing defects in primary cells and in the absence of p53.** Total RNA extracted at the indicated time points post-siRNA transfection from (a) IMR-90 or (b) HCT116 *p53<sup>-/-</sup>* cells was analyzed by Northern blotting using the indicated probes (refer to Figure 4c for a schematization of precursors detected by each probe). RNA loading was monitored by methylene blue staining of mature 18S/28S rRNAs.

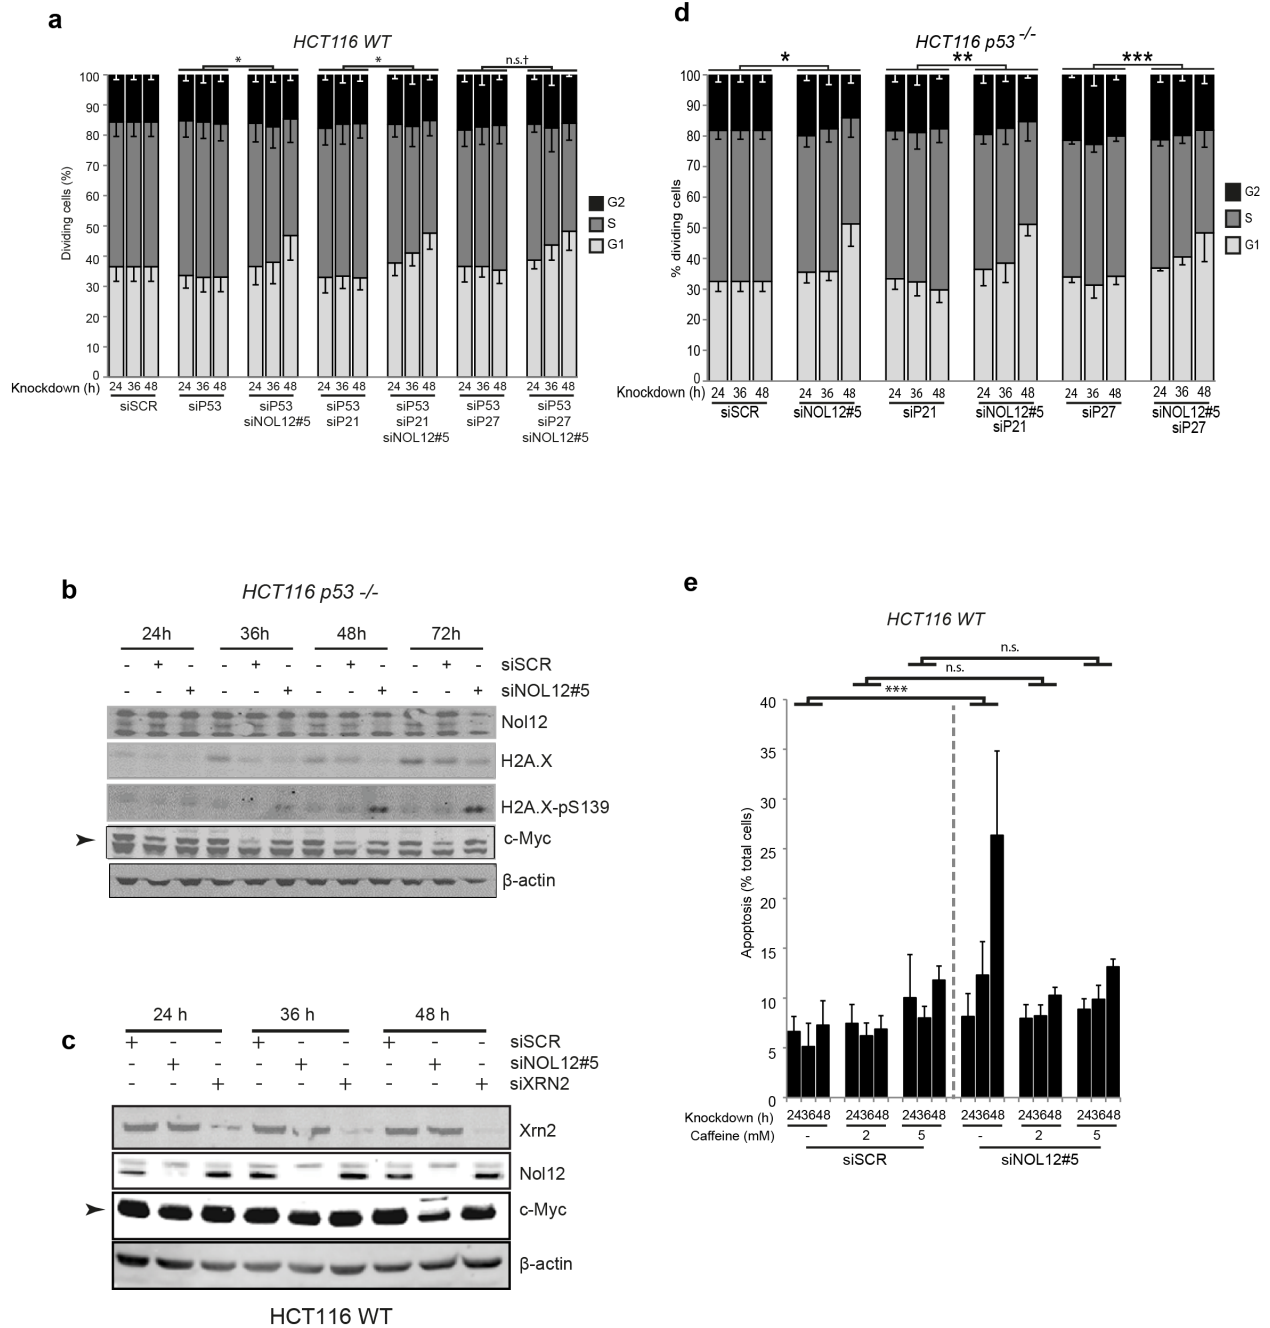

**Supplementary Figure 5. Nol12 depletion causes upregulation of DDR pathway proteins in a p53-, p21-, and p27-independent manner and signals via ATM/ATR.** (a) *Nol12*, *p21<sup>WAF1/CIP1</sup>*, *p27<sup>KIP1</sup>* and *p53* were depleted alone or in concert in HCT 116 WT cells for 24, 36 and 48h and G<sub>1</sub>, S and G<sub>2</sub> populations determined by Propidium Iodide (PI)-stained DNA content and quantified by FACS. (b) HCT116 *p53<sup>-/-</sup>* cells were either mock transfected, or siSCR-/siNOL12#5-transfected and harvested at the indicated times post-transfection for western blotting of whole cell lysates. Beta-actin was used as a loading control. (c) HCT116 WT cells were transfected with siSCR, siNOL12#5 or siXRN2 and harvested at the indicated times post-transfection for western blotting of whole cell lysates. Beta-actin was used as a loading control.

(d) *Nol12*, *p21*<sup>WAF1/CIP1</sup> and *p27*<sup>KIP1</sup> were depleted alone or in concert in HCT 116 *p53*<sup>-/-</sup> cells for 24, 36 and 48hs and G<sub>1</sub>, S and G<sub>2</sub> populations determined by Propidium Iodide (PI)-stained DNA content and quantified by FACS. Data represent mean±s.d. for 3-5 independent experiments. \*, p<0.05 by Student's two-tailed *t*-test on G<sub>1</sub> AUCs; †, 0.05<p<0.1 (borderline significance). (e) HCT116 WT cells were transfected with siSCR or siNOL12#5 (10μM) as indicated and grown in the presence of either 0, 2 or 5mM caffeine for the indicated times prior to quantification of annexin V-FITC-positive, PI-negative (apoptotic) populations by FACS.

## SUPPLEMENTARY TABLES.

Supplementary Tables 1-5 are included as separate .xls file

**Supplementary Table 1. List of proteins identified in Untagged and PrA-expressing HE293 control cell lines by ssAP-MS.**

**Supplementary Table 2. List of proteins enriched by PrA-Nol12 ssAP-MS analysis.** PrA-Nol12 ssAP-enriched proteins were defined as in Figure 1. Mean spectral counts of the two replicates of each condition were normalized against the average spectral count for the bait (PrA-Nol12) for that condition as a means of semi-quantitative analysis based on spectral counting (Oeffinger et al. 2007).

**Supplementary Table 3. Functional grouping of proteins enriched with PrA-Nol12 ssAP-MS analysis.** Proteins defined and quantified in Table S2 were subjected to functional classification as described in Figure 1. Within each functional class, proteins are sorted according to their distribution across the homology/purification patterns as defined in Table S2. The bait protein is highlighted in red. Proteins with multiple functions, thus appearing in multiple functional class lists, are marked with purple text.

**Supplementary Table 4. Proteins identified, but not enriched, with PrA-Nol12 ssAP.** List of proteins for which one or more enriched peptides were identified in the PrA-Nol12 ssAP analysis, but which did not meet the criteria of protein “enrichment” ( $\geq 3$  peptides enriched in both replicates of one or more condition). Human-yeast homology pairs were defined as for Table S2. Functional classes were defined as described in Figure 1.

**Supplementary Table 5: Proteins identified with recombinant Nol12.**

**Supplementary Table 6. List of antibodies used in this study.** CST, Cell Signalling Technologies; TBS+T, Tris-buffered saline with Tween-20; PBS+T, Phosphate-Buffered Saline with Tween-20; WB, western blot; IF, immunofluorescence.

| Target         | Supplier   | Code     | Use      | Dilution | Blocking Solution   |
|----------------|------------|----------|----------|----------|---------------------|
| $\beta$ -actin | Abcam      | AB8224   | WB       | 1/2000   | 5 % milk in TBS+T   |
| 53BP1          | Millipore  | MAB3802  | IF       | 1/500    | 1 % BSA in PBS+T    |
| 8-OHdG         | Millipore  | AB5830   | Dot Blot | 1/1000   | 1 % casein in TBS+T |
| Bmi1           | Abcam      | AB38295  | IF       | 1/100    | 1% BSA in PBS+T     |
| BRCA1          | Santa Cruz | SC-642   | WB       | 1/200    | 5 % milk in TBS+T   |
| c-Myc          | CST        | 5605     | WB       | 1/1000   | 5% BSA in TBS+T     |
| Caspase 3      | CST        | 9662     | WB       | 1/3000   | 5 % milk in TBS+T   |
| Chk1           | Abcam      | AB40866  | WB       | 1/1000   | 5 % milk in TBS+T   |
| Chk1-pS345     | CST        | 2348     | WB       | 1/1000   | 5% BSA in TBS+T     |
| Chk2           | CST        | 6334     | WB       | 1/1000   | 5% BSA in TBS+T     |
| Chk2-pS19      | CST        | 2666     | WB       | 1/1000   | 5% BSA in TBS+T     |
| Chk2-pT68      | CST        | 2197     | WB       | 1/1000   | 5% BSA in TBS+T     |
| Coilin         | GeneTex    | GTX11822 | IF       | 1/200    | 1% BSA in PBS+T     |
| Dcp1a          | Santa Cruz | SC100706 | IF       | 1/50     | 1% BSA in PBS+T     |
| Dhx9           | Abcam      | AB54593  | IF       | 1/500    | 1% BSA in PBS+T     |
| Fibrillarin    | Abcam      | AB4566   | IF       | 1/500    | 1 % BSA in PBS+T    |
| H2A.X          | CST        | 7631     | WB       | 1/1000   | 5 % milk in TBS+T   |



|                                 |                        |           |          |                            |                                                 |
|---------------------------------|------------------------|-----------|----------|----------------------------|-------------------------------------------------|
| H2A.X-pS139                     | CST                    | 9718      | WB, IF   | 1/400 (IF),<br>1/1000 (WB) | 5 % milk in TBS+T (WB)<br>1 % BSA in PBS+T (IF) |
| HA (rabbit)                     | CST                    | 3724      | IF       | 1/3200                     | 1 % BSA in PBS+T                                |
| HA (mouse)                      | Genscript              | A01244    | WB, IF   | 1/2000 (WB)<br>1/500 (IF)  | 5 % milk in TBS+T (WB)<br>1 % BSA in PBS+T (IF) |
| Mdm2                            | Abcam                  | AB16895   | WB       | 1/100                      | 5 % milk in TBS+T                               |
| Mdm2-pS166                      | CST                    | 3521      | WB       | 1/1000                     | 5% BSA in TBS+T                                 |
| NOL12                           | Bethyl<br>Laboratories | A160-100P | WB       | 1/2000                     | 5 % milk in TBS+T                               |
| NOL12                           | Sigma                  |           | IF       | 1/700                      | 1% BSA in PBS+T                                 |
| p21                             | CST                    | 2947      | WB       | 1/1000                     | 5 % milk in TBS+T                               |
| p27                             | CST                    | 3686      | WB       | 1/1000                     | 5 % milk in TBS+T                               |
| p53                             | Santa Cruz             | SC6243    | WB       | 1/200                      | 5 % milk in TBS+T                               |
| PML                             | Santa Cruz             | SC966     | IF       | 1/33                       | 1% BSA in PBS+T                                 |
| RPL5                            | Abcam                  | AB86863   | WB       | 1/1000                     | 5 % milk in TBS+T                               |
| RPL11                           | Abcam                  | AB79352   | WB, IF   | 1/500 (WB),<br>1/250 (IF)  | 5 % milk in TBS+T (WB)<br>1 % BSA in PBS+T (IF) |
| SC35                            | GeneTex                | GTX11826  | IF       | 1/200                      | 1% BSA in PBS+T                                 |
| SfpQ                            | Santa Cruz             | SC374502  | IF       | 1/500                      | 1% BSA in PBS+T                                 |
| Tia1                            | Santa Cruz             | SC1751    | IF       | 1/100                      | 1% BSA in PBS+T                                 |
| Xrn2                            | Abcam                  | AB74799   | WB       | 1/1000                     | 5 % milk in TBS+T                               |
| 2° anti-goat-800                | LI-COR                 | 926-32214 | Dot Blot | 1/15000                    | 1 % casein in TBS+T                             |
| 2° anti-mouse-<br>AF-488        | Life<br>Technologies   | A11001    | IF       | 1/500                      | 1 % BSA in PBS+T                                |
| 2° anti-mouse<br>DyLight® 680   | Li-Cor                 | 926-68022 | WB       | 1/20000                    | Same as primary<br>antibody                     |
| 2° anti-rabbit-<br>AF-555       | Life<br>Technologies   | A21428    | IF       | 1/500                      | 1 % BSA in PBS+T                                |
| 2° anti-rabbit-<br>DyLight® 800 | Li-Cor                 | 926-32213 | WB       | 1/5000                     | Same as primary<br>antibody                     |

**Supplementary Table 7. siRNAs used in this study.** For NOL12, XRN2, SCR and P53 siRNAs, individual strands were annealed at 37°C, 1 h prior to use.

| Target          | Sequence (sense)                                                                    | Sequence (antisense)                 | Supplier |
|-----------------|-------------------------------------------------------------------------------------|--------------------------------------|----------|
| NOL12<br>(#5)   | 5'-GGUCGAGCGAAAGAAGGCAC-<br>dTdT-3'                                                 | 5'-GUGCCUUCUUUCGUCGACC-<br>dTdT-3'   | Sigma    |
| NOL12-2<br>(#8) | 5'- GACGGAGUCGGUGCAGUAU-<br>dTdT-3'                                                 | 5'- AUACUGCACCGACUCCGUC-<br>dTdT-3'  | Sigma    |
| XRN2            | 5'- AAGAGUACAGAUGAUGUU-<br>dTdT-3'                                                  | 5'-AACAUCAUCAUCUGUACUCUU-<br>dTdT-3' | Sigma    |
| SCR             | 5'- UAAGGUUAAGUCGCCUCG-<br>dTdT-3'                                                  | 5'- CGAGGGCGACUUAACCUUA-<br>dTdT-3'  | Sigma    |
| p21             | SignalSilence® p21 Waf1/Cip1 siRNA I (Cell Signalling Technologies, Cat. No. #6456) |                                      |          |
| p27             | SignalSilence® p27 Kip1 siRNA II (Cell Signalling Technologies, Cat. No. #12410)    |                                      |          |
| p53             | 5'-GCAUCUUAUCCGAGUGGAA-<br>dTdT-3'                                                  | 5'-UCCACUCGGAUAAGAUGC-<br>dTdT-3'    | Sigma    |

**Supplementary Table 8. Northern Probes used in this study.** Probes were labeled as described in the Materials and Methods prior to use. Positions are defined relative to the 5' end of the 35S primary transcript.

| Probe                       | Position | Sequence                                                                                     |
|-----------------------------|----------|----------------------------------------------------------------------------------------------|
| ETS1<br>between 01-A0 sites | 1399     | <sup>+</sup> H <sub>4</sub> N-5'-cctcgccctccgggctccgtaatgatc-3'-NH <sub>4</sub> <sup>+</sup> |
| 5' of ITS1                  | 5520     | <sup>+</sup> H <sub>4</sub> N-5'-cgccaagaggagagggggtgcctcag-3'-NH <sub>4</sub> <sup>+</sup>  |
| ITS1 3' of site 2           | 6512     | <sup>+</sup> H <sub>4</sub> N-5'-gcgcgacggcggacgacaccgcgcgtc-3'-NH <sub>4</sub> <sup>+</sup> |
| 3' of ITS1                  | 6603     | <sup>+</sup> H <sub>4</sub> N-5'-cgtacgaggtcgattggcgag-3'-NH <sub>4</sub> <sup>+</sup>       |
| 5.8S                        | 6690     | <sup>+</sup> H <sub>4</sub> N-5'-ctgcgagggaaaccccagccgca-3'-NH <sub>4</sub> <sup>+</sup>     |
| ITS2 5' of site 4           | 7564     | <sup>+</sup> H <sub>4</sub> N-5'-caatgttcctgcaattcac-3'-NH <sub>4</sub> <sup>+</sup>         |
| 7SL                         | N/A      | <sup>+</sup> H <sub>4</sub> N-5'-gctccggttccgacctgggcc-3'-NH <sub>4</sub> <sup>+</sup>       |
